# Supplementary material
Source: PubMed Central journal article supplement (PMC3653393)
Supplement: Supp_Fig1.pdf [file Supp_Fig1.pdf]

# Supplementary Data

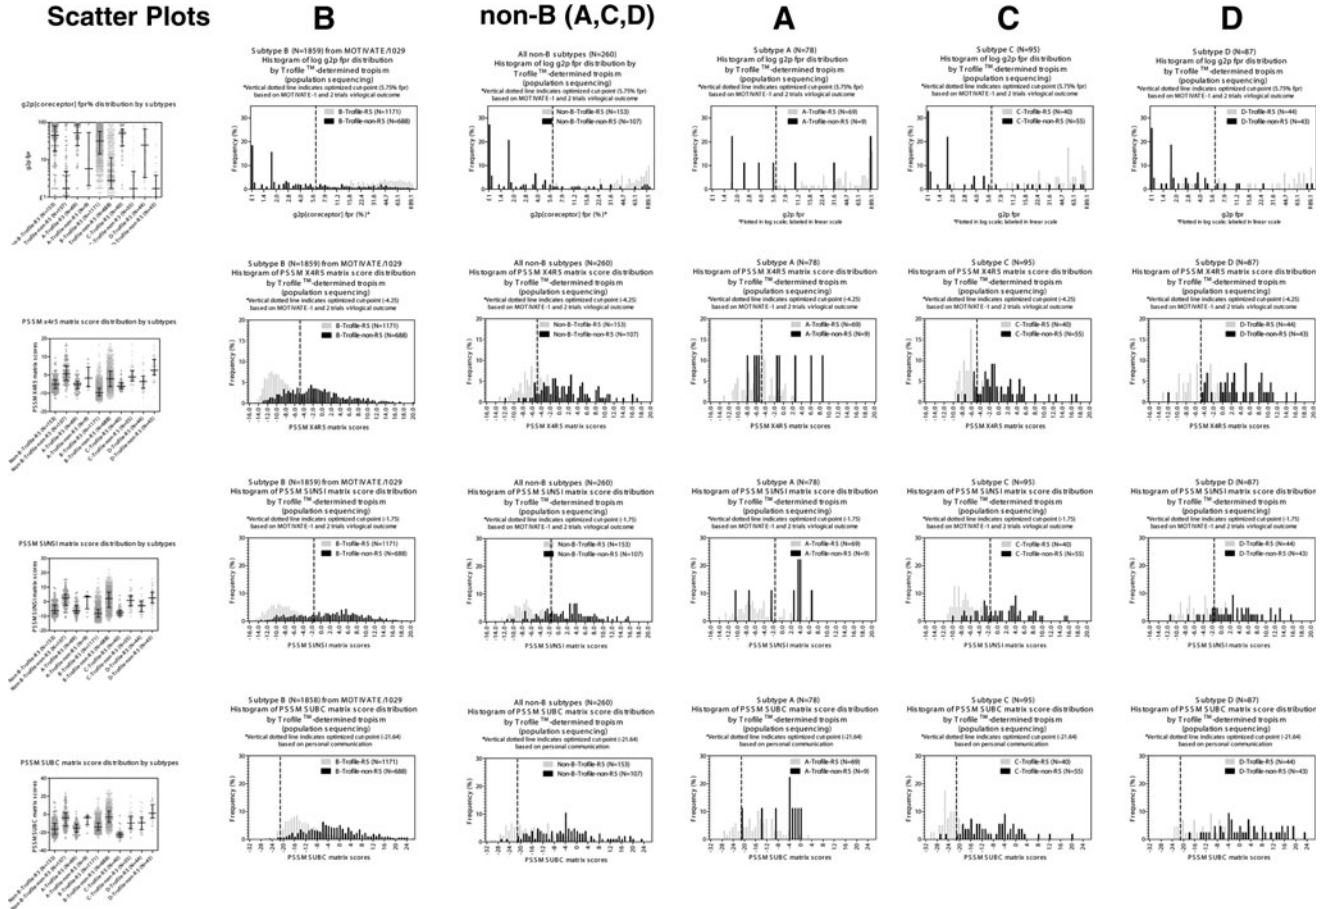

**SUPPLEMENTARY FIG. S1.** Detail dissection of all population sequencing score distributions generated by g2p[ceptor], PSM X4/R5, PSM SI/NSI, and PSM subtype C, grouped by subtypes.
