# Supplementary material
Source: PubMed Central journal article supplement (PMC3653393)
Supplement: Supp_Fig2.pdf [file Supp_Fig2.pdf]

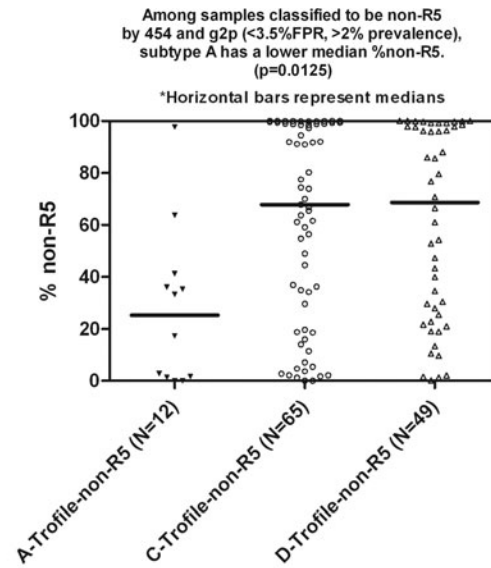

|                                                      |                                        |                        |         |
|------------------------------------------------------|----------------------------------------|------------------------|---------|
| Table Analyzed                                       | 454 g2pWeb g2p3.5 %non-R5 (original %) |                        |         |
| Kruskal-Wallis test                                  |                                        |                        |         |
| P value                                              | 0.0125                                 |                        |         |
| Exact or approximate P value?                        | Gaussian Approximation                 |                        |         |
| P value summary                                      | *                                      |                        |         |
| Do the medians vary signif. (P < 0.05)               | Yes                                    |                        |         |
| Number of groups                                     | 3                                      |                        |         |
| Kruskal-Wallis statistic                             | 8.77                                   |                        |         |
| Dunn's Multiple Comparison Test                      | Difference in rank sum                 | Significant? P < 0.05? | Summary |
| A-Trofile-non-R5 (N=12) vs C-Trofile-non-R5 (N=65) ) | -32.9                                  | Yes                    | *       |
| A-Trofile-non-R5 (N=12) vs D-Trofile-non-R5 (N=49) ) | -32.1                                  | Yes                    | *       |
| C-Trofile-non-R5 (N=65) vs D-Trofile-non-R5 (N=49) ) | 0.759                                  | No                     | ns      |

**SUPPLEMENTARY FIG. S2.** Deep sequencing reveals that among subtype A, C, and D samples classified as non-R5 by Trofile, subtype A has the lowest median %non-R5 (Kruskal-Wallis test,  $p=0.0125$ ). Horizontal lines represent medians.
